# Supplementary material for: Zinc-Doped Bioactive Glass/Polycaprolactone Hybrid Scaffolds Manufactured by Direct and Indirect 3D Printing Methods for Bone Regeneration
Source: MDPI journal article supplement (doi:10.3390/cells12131759), 2023-06-30
Supplement: s1 [file s1]

## Supplementary Information

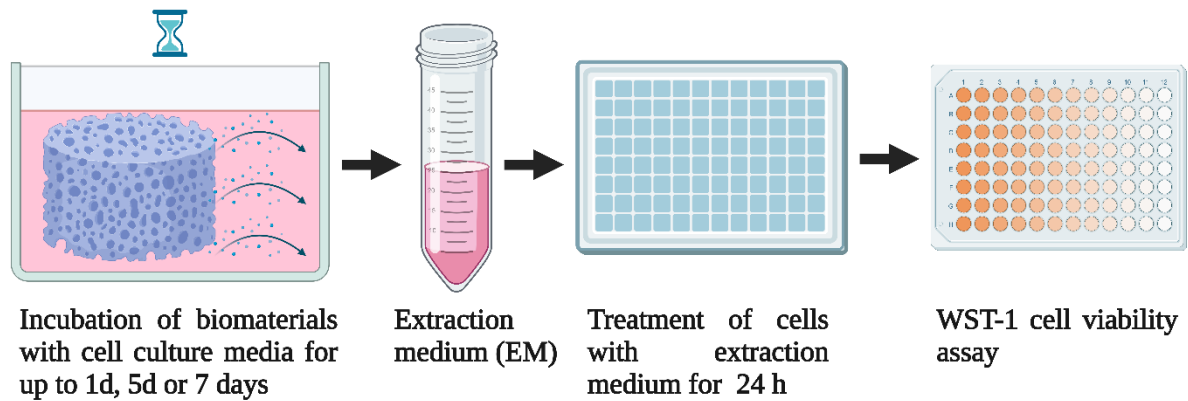

Figure S1. Indirect cell viability assay, created with BioRender.com.

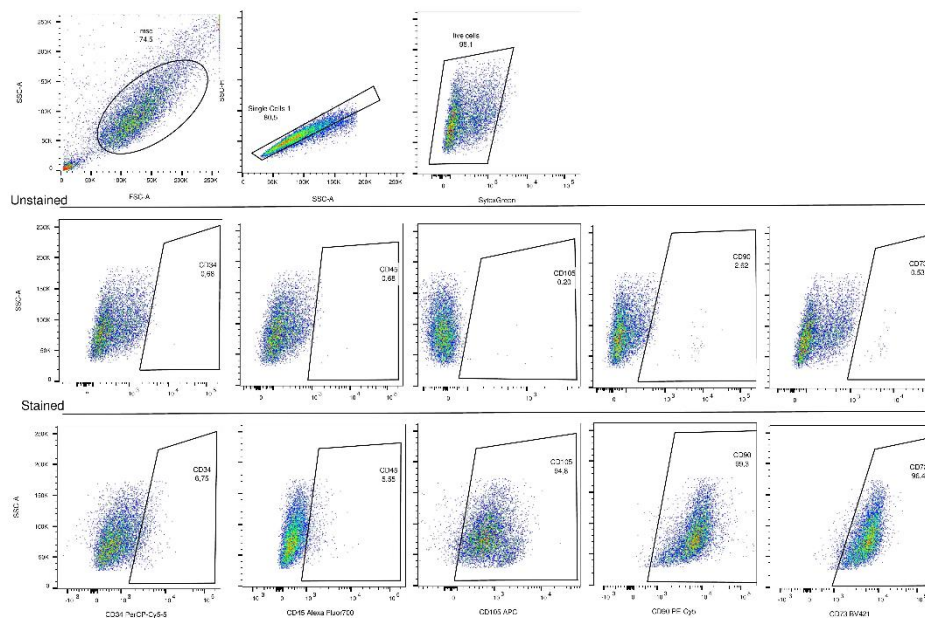

Figure S2. Flow cytometric analysis of stem cell marker expression – Donor C.

| Antigen | Fluophore        | Company                     | Cat. number |
|---------|------------------|-----------------------------|-------------|
| CD34    | PerCP/Cy5        | BioLegend, San Diego, USA   | 343521      |
| CD45    | Alexa Fluor700   | BioLegend, San Diego, USA   | 368513      |
| CD73    | Brilliant Violet | BioLegend, San Diego, USA   | 344008      |
| CD90    | PE/Cy5           | BDPharmingen, San Jose, USA | 555597      |
| CD105   | APC              | BioLegend, San Diego, USA   | 323208      |

Table S1. Staining reagents – antibody list.

| Biological donor | % viable cells | %CD34 +cells | %CD45 +cells | %CD73 +cells | %CD90 +cells | %CD105 +cells |
|------------------|----------------|--------------|--------------|--------------|--------------|---------------|
| A                | 98,9           | 20           | 6,9          | 99,9         | 98,5         | 97,6          |
| B                | 96,9           | 32,1         | 4,8          | 99,9         | 99,4         | 97,7          |

|   |      |      |     |      |      |      |
|---|------|------|-----|------|------|------|
| C | 98,1 | 6,8  | 5,6 | 97,0 | 99,3 | 94,8 |
| D | 97,2 | 26,8 | 5,1 | 99,2 | 99,4 | 62,1 |

\* For visualization, dot plots of donor C are included below

**Table S2.** Flow cytometry analysis of bone marrow primary cells.

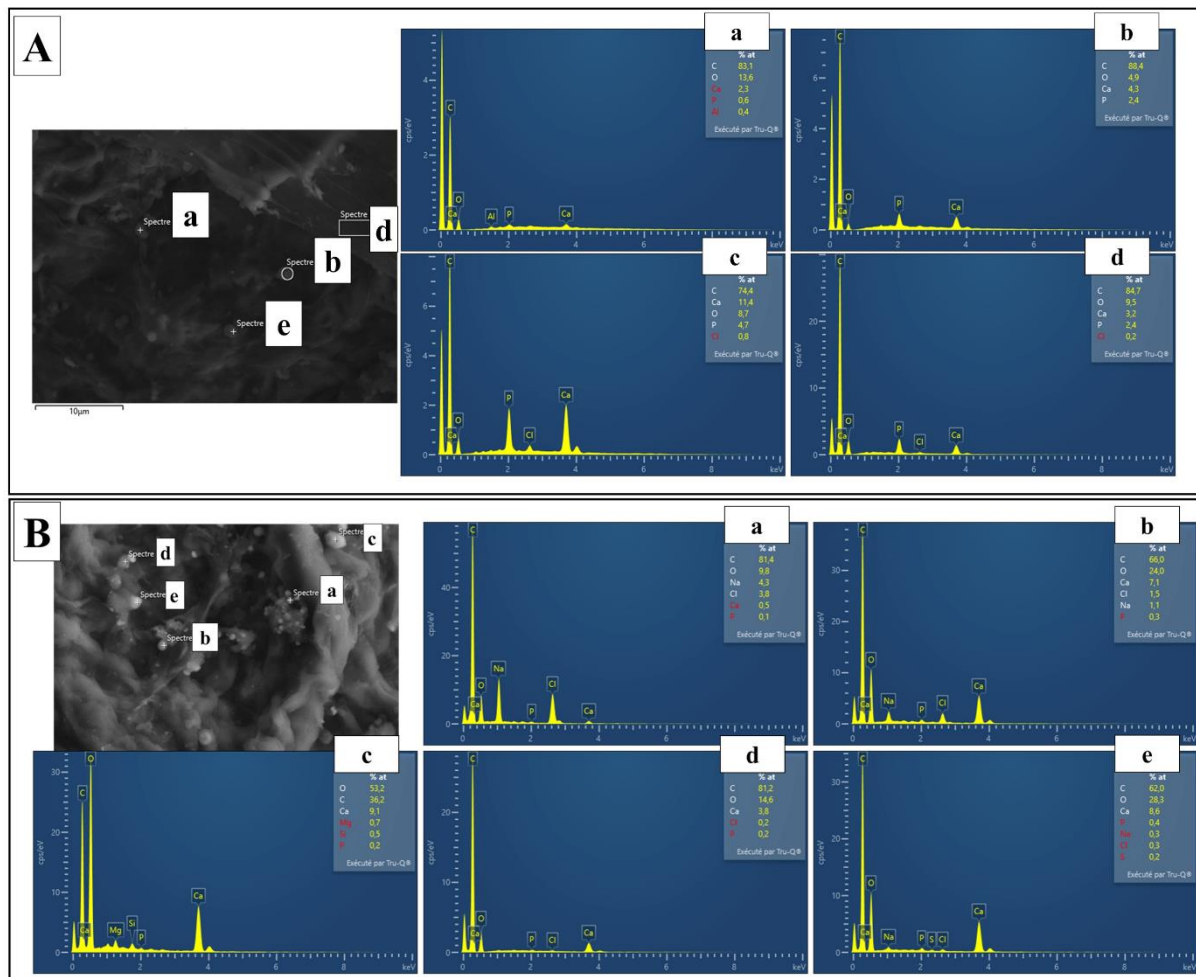

**Figure S3.** SEM images and EDS spectra of i) Hyb80 and ii) Zn-Hyb80 scaffolds after 7 days of incubation in SBF (As the scaffolds material is P-free, less P element index in Zn-Hyb80 is a sign of less CaP formation and inferior bioactivity).

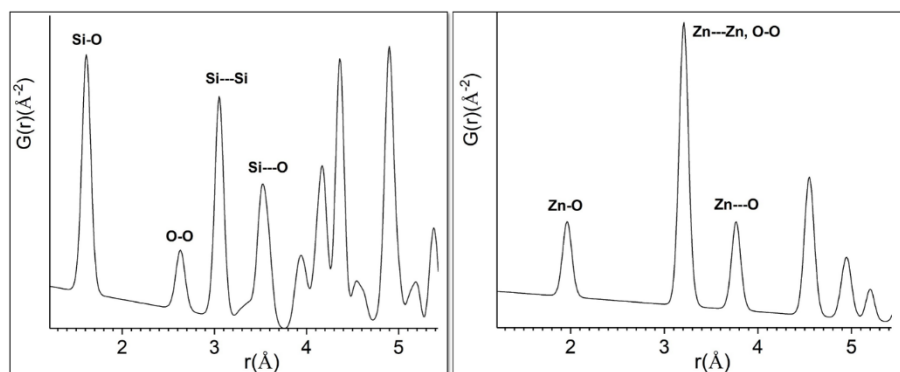

**Figure S4.** PDF simulations of Quartz (left: COD 1526860) and Zincite (right: COD 1011258).

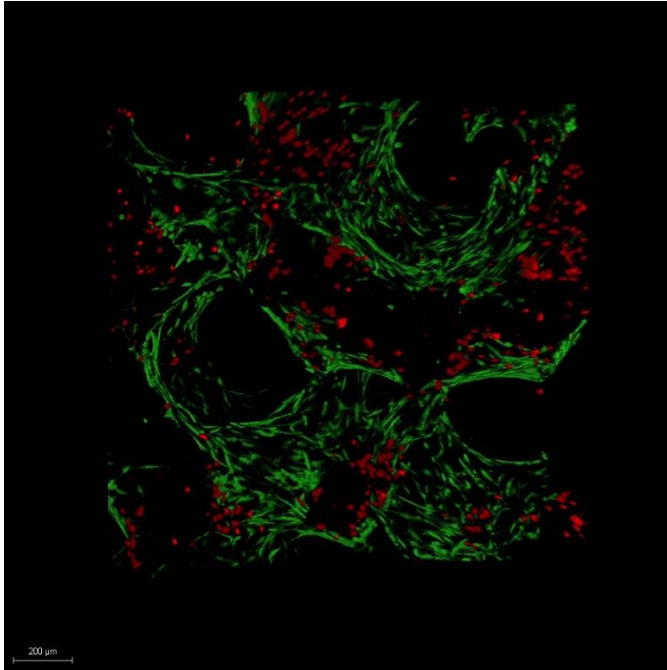

**Multimedia file M1.** LIVE/DEAD Staining of Hyb scaffold at 3 weeks, Scale bar is 200  $\mu\text{m}$ , a link to the video should be provided in the image, the video was uploaded separately
